1 **The pre-existing human antibody repertoire to computationally optimized influenza H1**  
2 **hemagglutinin vaccines**

3

4 Kaito Nagashima,<sup>1,2</sup> John V. Dzimianski,<sup>3</sup> Julianna Han,<sup>4</sup> Nada Abbadi,<sup>1,2</sup> Aaron D. Gingerich,<sup>2</sup>  
5 Fredejah Royer,<sup>2</sup> Sara O'Rourke,<sup>3</sup> Giuseppe A. Sautto,<sup>2</sup> Ted M. Ross,<sup>1,2</sup> Andrew B. Ward,<sup>4</sup>  
6 Rebecca M. DuBois,<sup>3</sup> Jarrod J. Mousa<sup>1,2,5,\*</sup>

7

8 <sup>1</sup>Department of Infectious Diseases, College of Veterinary Medicine, University of Georgia,  
9 Athens, GA, USA

10 <sup>2</sup>Center for Vaccines and Immunology, College of Veterinary Medicine, University of Georgia,  
11 Athens, GA, USA

12 <sup>3</sup>Department of Biomolecular Engineering, University of California Santa Cruz, Santa Cruz, CA,  
13 USA

14 <sup>4</sup>Department of Integrative Structural and Computational Biology, The Scripps Research Institute,  
15 La Jolla, CA, USA

16 <sup>5</sup>Department of Biochemistry and Molecular Biology, Franklin College of Arts and Sciences,  
17 University of Georgia, Athens, GA, USA

18

19 \*Corresponding author: [jarrod.mousa@uga.edu](mailto:jarrod.mousa@uga.edu)

20

21 Running title: H1 COBRA mAbs

## 22 **Abstract**

23 The computationally optimized broadly reactive antigen (COBRA) approach has previously been  
24 used to generate hemagglutinin (HA) immunogens for several influenza subtypes that expand  
25 vaccine-elicited antibody breadth. As nearly all individuals have pre-existing immunity to influenza  
26 viruses, influenza-specific memory B cells will likely be recalled upon COBRA HA vaccination.  
27 We determined the epitope specificity and repertoire characteristics of pre-existing human B cells  
28 to H1 COBRA HA antigens. Cross-reactivity between wild type HA and H1 COBRA HA proteins  
29 were observed at both the oligoclonal B cell level and for a subset of isolated monoclonal  
30 antibodies (mAbs). The mAbs bound five distinct epitopes on the pandemic *A/California/04/2009*  
31 head and stem domains, and the majority of the mAbs had HAI and neutralizing activity against  
32 pandemic H1 strains. Two head-directed mAbs, CA09-26 and CA09-45, had HAI and neutralizing  
33 activity against a pre-pandemic H1 strain. One mAb, P1-05, targets the stem region of H1 HA  
34 proteins, but does not compete with known stem-targeting H1 mAbs. We determined that mAb  
35 P1-05 recognizes a recently discovered membrane proximal epitope on HA, the anchor epitope,  
36 and we identified similar mAbs using B cell repertoire sequencing. In addition, the trimerization  
37 domain distance from HA was critical to recognition of this epitope by P1-05. Overall, these data  
38 indicate that seasonally vaccinated individuals possess a population of functional H1 COBRA HA-  
39 reactive B cells that target head, central stalk, and anchor epitopes, and demonstrate the  
40 importance of structure-based assessment of subunit protein vaccine candidates to ensure  
41 accessibility of optimal protein epitopes.

42 **Significance**

43 Influenza imposes significant human and economic costs every year. The current seasonal  
44 vaccine elicits primarily strain-specific antibodies, and year to year vaccine effectiveness is  
45 variable. The COBRA approach could provide longer protection and obviate the requirement for  
46 annual vaccination. Whereas COBRA HAs have previously been evaluated in animal models, the  
47 pre-existing COBRA HA-reactive human B cell population has yet to be elucidated, and is  
48 important to identify specific B cells that may be recalled by H1 HA COBRA vaccination. This work  
49 demonstrates that seasonally vaccinated individuals possess a functional B cell population  
50 targeting both head and stem domains that could be recalled with COBRA HA immunogens.

## 51 **Introduction**

52 Influenza viruses are a major cause of morbidity and mortality worldwide each year (1). In  
53 particular, influenza A viruses (IAVs) and influenza B viruses cause annual epidemics in humans,  
54 and IAVs have caused multiple pandemics over the past century (2). Currently, H1N1 and H3N2  
55 IAVs circulate in humans to cause epidemic disease (3, 4). Long-term protection to influenza  
56 viruses remains a challenge due to high mutation rates caused by a low-fidelity RNA polymerase,  
57 which leads to antigenic drift, as well as reassortment events of HA and NA with avian influenza  
58 viruses, which is termed antigenic shift (5). The mutability of influenza necessitates annual  
59 vaccination for protection against circulating strains (6). Current seasonal influenza vaccines  
60 provide protection against matched circulating viral strains. However, vaccine efficacy varies year  
61 to year due to mismatches between circulating strains and vaccine strains, as well as differences  
62 in hemagglutinin (HA) protein glycosylation patterns between vaccine and circulating strains (7–  
63 9). This variability in vaccine efficacy highlights the importance of developing an improved  
64 influenza vaccine, which would elicit an immune response to most circulating influenza A and/or  
65 B viruses (10). Current vaccines typically elicit strain-specific antibodies, and only a minority show  
66 cross-reactivity to other viral subtypes. The antibody response to influenza virus infection and  
67 vaccination focuses predominantly on HA. Within HA-targeting antibodies, those targeting the  
68 variable globular head domain dominate the response, whereas antibodies that bind the more  
69 conserved stem domain are elicited less frequently (11).

70

71 Computationally optimized broadly reactive antigen (COBRA) HA immunogens aim to elicit a  
72 broader antibody response compared to current seasonal vaccines (12, 13). In this approach,  
73 multiple-layered consensus building alignments of HA sequences are used to generate an  
74 immunogen encompassing multiple antigenic epitopes for one subtype (12). The resulting  
75 constellation of consensus epitopes, focused primarily in the antigenic sites of the head domain,  
76 represent diverse sequences that elicit broadly reactive antibodies in several animal models,

77 including in mice and ferrets (12, 13). Structural analysis of COBRA HA immunogens has shown  
78 that these antigens resemble wild type HA proteins (14). The primary mechanism of COBRA HA-  
79 induced antibodies are through hemagglutination inhibition (HAI) and neutralization via HA head-  
80 domain binding antibodies (12). In contrast, stem-directed antibodies do not appear to be a major  
81 component of COBRA HA vaccine-induced immunity (15, 16).

82

83 H1N1 IAVs have caused two known pandemics, including the Spanish flu pandemic of 1918-1919,  
84 which caused an estimated 40-50 million deaths, and the 2009 swine flu pandemic, which caused  
85 an estimated 575,000 deaths (17). Circulating 2009 pandemic pH1N1/09-like viruses have  
86 replaced pre-2009 seasonal H1N1 influenza viruses in the human population (17). Antigenic sites  
87 defined on the H1 subtype HA have been characterized through mutagenesis studies in the  
88 presence of neutralizing antibodies (18). These highly variable sites are present on the  
89 immunodominant head domain, and include the Sa, Sb, Ca1, Ca2, and Cb sites (18). More  
90 recently discovered antibody epitopes include the receptor-binding site (RBS), the lateral patch,  
91 and the intratrimeric epitope, which exhibit broader reactivities (10, 19–21). A number of H1  
92 subtype-based COBRA HAs have been previously described that incorporate both seasonal (pre-  
93 2009) and pandemic-like (post-2009) influenza virus HA sequences. These include P1, which  
94 incorporates human sequences from 1933 to 1957 and 2009 to 2011 as well as swine sequences  
95 from 1931 to 1998, and X6, which incorporates human sequences from 1999 to 2012 (22).

96

97 An individual's immune history to influenza also plays a major role in the antibody response to  
98 vaccination. For example, the idea of original antigenic sin (OAS) describes the dominant nature  
99 of the antibody response to the first influenza virus strain compared to exposures to subsequent  
100 strains (23). While COBRA HA immunizations have been shown to be efficacious in naïve as well  
101 as pre-immune mouse and ferret models of influenza infection, pre-existing immunity to COBRA  
102 HAs in humans has not been investigated, and is important to understand as these antigens move

103 toward clinical trials. Here, we identify epitope and repertoire characteristics of the recalled  
104 antibody response from previous infection and vaccination that may be stimulated by H1 COBRA  
105 HA antigens. We show that human antibodies and B cells that cross-react with COBRA HAs are  
106 present in individuals vaccinated with the 2017-2018 and 2019-2020 quadrivalent influenza  
107 vaccine (QIV). A panel of 26 monoclonal antibodies (mAbs) was isolated, and these mAbs bind  
108 five distinct epitopes on the A/California/04/2009 HA protein, including an epitope near the viral  
109 membrane, termed the anchor epitope. Moreover, a subset of these mAbs bind both pre- and  
110 post-2009 pandemic strains with demonstrable HAI and neutralization activity. Overall, our data  
111 identify the major epitopes and repertoire characteristics of pre-existing human antibodies that  
112 recognize COBRA HA antigens.

113

## 114 **Materials and Methods**

115

### 116 **Human subject samples.**

117 All human studies were approved by the University of Georgia Institutional Review Board. mAb  
118 isolation was conducted from subjects vaccinated with the 2017-2018 seasonal influenza vaccine  
119 (Fluzone) from peripheral blood mononuclear cells (PBMCs) isolated from blood draws 21-28  
120 days following vaccination. Repertoire sequencing was completed from a single human subject  
121 vaccinated with the 2019-2020 influenza vaccine (Fluzone) from blood obtained 28 days following  
122 vaccination.

123

### 124 **B cell expansion of human subject PBMCs.**

125 PBMCs were plated at a density of 25,000 cells/well in a 96-well plate on a layer of gamma-  
126 irradiated NIH 3T3 cells (20,000 cells/well) expressing hCD40L, hIL-21, and hBAFF in the  
127 presence of CpG and cyclosporine A as previously described (24, 25). B cell supernatants were  
128 screened by enzyme-linked immunosorbent assay (ELISA) at 7 days post-plating of PBMCs.

129

130 **Expression and purification of recombinant influenza HA proteins.**

131 Trimeric wild-type HA or COBRA HA ectodomains were expressed and purified in Expi293F cells  
132 following the manufacturer's protocol and as previously described (26). Collected supernatants  
133 containing the HA antigens were purified on a HisTrap Excel column following the manufacturer's  
134 recommended protocol. Eluted fractions were pooled and purified proteins were verified for  
135 integrity by probing with an anti-HIS tag antibody (Biolegend) as well as with subtype-specific  
136 mAbs via SDS-PAGE and Western blot.

137

138 **ELISA screening of B cells, hybridoma supernatants, and mAbs.**

139 Untreated 384-well plates (VWR) were coated with recombinant HA proteins diluted to 2 µg/mL  
140 in PBS at 4 °C overnight. Plates were washed once with water, then blocked with 2% blocking  
141 buffer (PBS + 2% non-fat dry milk (Bio-Rad) + 2% goat serum + 0.05% Tween-20) for 1 hr at  
142 room temperature. Plates were washed three times with water, and 25 µL of B cell supernatants,  
143 hybridoma supernatants, or mAbs were added. mAbs were serially diluted three-fold in PBS from  
144 20 µg/mL prior to addition for twelve total dilutions. Plates were incubated at 37 °C for 1 hr, then  
145 washed three times with water. Goat anti-human IgG Fc-AP secondary antibody (Southern  
146 Biotech), diluted 1:4000 in 1% blocking buffer (1:1 dilution of PBS and 2% blocking buffer), was  
147 added and plates were incubated at room temperature for 1 hr. Plates were then washed five  
148 times with PBS-T (PBS + 0.05% Tween-20). *p*-Nitrophenyl phosphate (PNPP) substrate, diluted  
149 in substrate buffer (1.0 M Tris + 0.5 mM MgCl<sub>2</sub>, pH=9.8) to 1 mg/mL, was added, and plates were  
150 incubated for 1 hr and read at 405 nm on a BioTek plate reader. To quantify HA-reactive IgG from  
151 each subject, plates were coated overnight with eight two-fold serial dilutions of human plasma  
152 IgG standard (Athens Biotechnology) starting at 10 µg/mL. All steps were followed as for antigen,  
153 except PBS was used in the primary antibody step. GraphPad Prism was used to interpolate

154 antigen-reactive IgGs from the human plasma IgG standard curve. The EC<sub>50</sub> value for each mAb  
155 was determined by using the four-parameter logistic curve fitting function in GraphPad Prism  
156 software.

157

#### 158 **Generation of HA-reactive mAbs.**

159 Eight days following plating of PBMCs, wells identified to contain positive B cells by ELISA were  
160 selected for electrofusion to generate hybridomas as previously described (24, 25). Hybridomas  
161 were plated in 384-well plates for HAT selection, and grown for 14 days at 37°C, 5% CO<sub>2</sub>.  
162 Following screening by ELISA, hybridomas were single-cell sorted using a MoFlo Astrios cell  
163 sorter using live/dead staining by propidium iodide. The sorted hybridomas were cultured in 25%  
164 Media E (StemCell) + 75% Media A (StemCell) for two weeks, then subjected to another round  
165 of screening by ELISA. Hybridomas with the highest signal were grown in 250 mL serum-free  
166 media (Gibco) for approximately one month. Secreted mAbs were purified using a Protein G  
167 column (GE Healthcare) and concentrated for use in downstream assays.

168

#### 169 **Hybridoma sequencing.**

170 Hybridoma cell lines encoding each mAb were sequenced utilizing the primers described by  
171 Guthmiller *et al.* (27). Briefly, RNA was extracted from each hybridoma and cDNA was generated  
172 using the SuperScript IV First-Strand cDNA Synthesis Kit (Invitrogen). A nested PCR protocol  
173 was used to generate sequencing products. In the first nested PCR step, a primer mix specific to  
174 the heavy, kappa, or lambda chain *V* gene and the constant region were used to amplify the  
175 variable region using the cDNA as template. In the second PCR step, the first PCR product was  
176 used as a template with a nested primer mix to improve product specificity and yield. The second  
177 nested PCR products were sequenced using the constant region primer and the *V*, *D*, and *J*  
178 alleles were identified by IMGT/V-QUEST (28).

179



180 **Hemagglutination inhibition assay.**

181 The HAI titer for each mAb was determined as previously described (16). Influenza viruses were  
182 titered to eight HAUs (hemagglutination units). 50  $\mu$ L of mAbs diluted to 20  $\mu$ g/mL in PBS were  
183 added to the first well of a 96-well U-bottom plate (VWR), and diluted two-fold in PBS for 25  $\mu$ L  
184 mAb total per dilution. Eight HAUs of virus were added in a 1:1 ratio to each mAb dilution, and  
185 each well was mixed and incubated for 20 min at room temperature. Following this, 50  $\mu$ L of 1.0%  
186 turkey red blood cells (Lampire) were added per well. Plates were read 45 min after the addition  
187 of 1.0% turkey red blood cells.

188

189 **Focal reduction assay.**

190 Focal reduction assays (FRAs) were completed for each mAb as previously described (16).  
191 MDCK cells were plated in 96-well plates overnight to achieve >95% confluency the next day.  
192 Cells were washed twice with PBS, and 50  $\mu$ L of virus growth media (VGM: DMEM + 2  $\mu$ g/mL  
193 TPCK-trypsin + 7.5% BSA) were added and the plates were returned to the incubator at 37°C,  
194 5% CO<sub>2</sub>. mAbs at 20, 8, or 1  $\mu$ g/mL were serially diluted two-fold in VGM, and virus was diluted  
195 to a concentration of 1.2x10<sup>4</sup> FFU/mL in VGM. MDCK cells were washed with PBS and 25  $\mu$ L  
196 serially diluted mAbs were added, followed by 25  $\mu$ L of 1.2x10<sup>4</sup> FFU/mL of virus. Plates were  
197 incubated at 37 °C, 5% CO<sub>2</sub> for 2 hr, and then 100  $\mu$ L/well of overlay media (1.2% Avicel +  
198 modified Eagle media (MEM)) were added and incubated overnight. The overlay was removed  
199 and wells were washed twice with PBS. Ice-cold fixative (20% formaldehyde + 80% methanol)  
200 was added and plates were incubated at 4 °C for 30 min. Plates were washed twice with PBS and  
201 permeabilization buffer (PBS + 0.15% glycine + 0.5% Triton-X 100) was added, followed by a 30  
202 min incubation. Plates were washed three times with PBS-T and primary IAV anti-NP mouse  
203 antibody (IRR), diluted 1:2000 in ELISA buffer (PBS + 10% goat serum + 0.1% Tween-20), was  
204 added. Plates were incubated at room temperature for 1 hr. Plates were then washed three times

205 with PBS-T and secondary goat anti-mouse IgG-HRP antibody (Southern Biotech), diluted 1:4000  
206 in ELISA buffer, was added. Plates were incubated at room temperature for 1 hr and then washed  
207 with PBS-T. KPL TrueBlue Peroxidase substrate was added per well and plates were incubated  
208 for 10-20 min. Plates were washed, dried, and foci were enumerated using an ImmunoSpot S6  
209 ULTIMATE reader with ImmunoSpot 7.0.28.5 software (Cellular Technology Limited).  
210 Neutralizing IC<sub>50</sub>s were calculated using the GraphPad Prism four-parameter logistic curve fitting  
211 function.

212

### 213 **Epitope binning by biolayer interferometry.**

214 The panel of mAbs isolated from human subjects were competed for binding using the  
215 A/California/04/2009 HA protein on the OctetRED384 system as previously described (24). Anti-  
216 penta-HIS biosensors (Sartorius) were immersed in kinetics buffer (PBS + 0.5% BSA + 0.05%  
217 Tween-20) for 60 s to obtain a baseline reading. Biosensors were then loaded with 100 µg/mL of  
218 A/California/04/2009 HA protein diluted in kinetics buffer for 60 secs. Biosensors were returned  
219 to kinetics buffer for a baseline of 60 s. Following this, biosensors were immersed in the first mAb  
220 (100 µg/mL in kinetics buffer) for 300 s for the association step. The biosensors were then  
221 immersed in the competing, second mAb (100 µg/mL in kinetics buffer) for 300 s. The biosensors  
222 were then regenerated in 0.1 M glycine, pH = 2.7 and PBS alternately for three cycles before  
223 proceeding to the next mAb competition set. The extent of competition was calculated as the  
224 percentage of the signal from the second mAb in the second association step in the presence of  
225 the first mAb to that of the second mAb alone in the first association step for all biosensors. A  
226 ratio of ≤33% was considered complete competition, >33 and ≤67% moderate competition, and  
227 >67% no competition.

228

### 229 **Antibody escape mutant generation.**

230 To identify epitopes important for mAb binding, MDCK cells were plated in 24-well plates overnight  
231 to achieve >95% confluency. Cells were washed twice with PBS, then 200  $\mu$ L of virus, diluted in  
232 VGM to an MOI=0.01, was added. Cells were returned to 37 °C, 5% CO<sub>2</sub>. Infection proceeded for  
233 1 hr. Viral inoculum was then removed and VGM containing mAb at 1x IC<sub>50</sub> was added. Cells  
234 were returned to 37 °C, 5% CO<sub>2</sub> for 24 hr. For the subsequent passage, MDCK cells at >95%  
235 confluency were washed with PBS twice, and a 1:10 dilution of the media from the first passage  
236 in 200  $\mu$ L virus growth media was used to infect MDCK cells, followed by a 1 hr incubation. Viral  
237 inoculum was removed and virus growth media containing mAb at 1x IC<sub>50</sub> was added, and cells  
238 were incubated at 24 hr at 37 °C, 5% CO<sub>2</sub>. This was done for five passages with mAb at 1x IC<sub>50</sub>,  
239 then one passage with mAb at 2x IC<sub>50</sub>, followed by two passages with mAb at 3x IC<sub>50</sub> for eight  
240 passages total. After the eighth passage, media containing escape mutant virus was stored, and  
241 cells were pelleted by centrifugation at 3000 rpm. Cells were lysed using SPRI beads and RNA  
242 was extracted. vRNA encoding the HA gene was amplified using the Uni12 primer specific to all  
243 influenza genome segments by RT-PCR (29). In a subsequent PCR step, HA-specific primers  
244 from Deng et al. (29) were used to amplify the HA segment of the pandemic H1N1 virus. Sanger  
245 sequencing was used to identify escape mutations. Escape mutations were considered significant  
246 either if they appeared in two of three replicates, or if a mutation was present within ten amino  
247 acids of another.

248

#### 249 **Antibody-dependent phagocytic activity of mAbs.**

250 To measure antibody-dependent phagocytic activity,  $2 \times 10^9$  1- $\mu$ m Neutravidin-coated yellow-  
251 green FluoSpheres (Invitrogen #F8776) were resuspended in 1 mL of 0.1% PBS. The  
252 FluoSpheres were then centrifuged at 5000 rpm for 15 minutes, 900  $\mu$ L supernatant was removed,  
253 and the FluoSpheres were resuspended with 900  $\mu$ L of 0.1% PBS. This process was repeated  
254 for a second wash, then the FluoSpheres were resuspended with 20  $\mu$ g of biotinylated Y2 protein.

255 The FluoSpheres were then incubated overnight at 4 °C, protected from light, with end-to-end  
256 rocking. Next, HA-specific antibodies were diluted in complete RPMI media (cRPMI, RPMI + 10%  
257 FBS) to a final concentration of 1 µg/mL in a U-bottom 96-well plate. Then, 20 µL of antibody  
258 dilution was transferred into a clean F-bottom 96-well plate, and 10 µL of FluoSpheres were added  
259 with the antibody followed by a 2 hr incubation at 37 °C for opsonization. After 1.5 hr, THP-1 cells  
260 were centrifuged at 200 × g for 5 min, washed once with PBS, then resuspended in culture  
261 medium (RPMI & 10% FBS) at a concentration of 5×10<sup>5</sup> cells/mL. Then, 200 µL of cells were  
262 added to each well and incubated at 37 °C with 5% CO<sub>2</sub> while shaking for 6 hr. Once the  
263 incubation finished, the plate was then centrifuged at 2000 rpm for 5 min. Then, 100 µL was  
264 pipetted out of each well and replaced with 100 µL of cold 4% paraformaldehyde to fix the cells.  
265 The plate was then left at room temperature for 20 min, protected from light. The plate was then  
266 stored at 4 °C in the dark. Cells were then analyzed with a NovoCyte Quanteon flow cytometer.

267

#### 268 **Expression and purification of recombinant proteins for electron microscopy.**

269 For EM studies, Y2 HA COBRA was cloned using Gibson assembly into a derivative of  
270 pcDNA3.1+ (30). Plasmids for the P1-05 heavy and light chain were synthesized (Genscript) and  
271 cloned into pcDNA3.1+. Cells and media were purchased from Thermo Fisher Life Technologies  
272 unless stated otherwise. Y2 HA protein expression was initiated by transfection of endotoxin free  
273 DNA into CHO-S cells using flow electroporation technology (MaxCyte). Transfected cells were  
274 suspended in CD OptiCHO supplemented with 2 mM GlutaMAX, HT, 0.1% pluronic acid, and  
275 incubated at 37 °C, 8% CO<sub>2</sub>, 85% humidity in an orbital shaker (Kuhner). After 24 hrs, cultures  
276 were supplemented with 1 mM sodium butyrate, and the culture temperature was dropped to 32°C.  
277 Cultures were supplemented daily with MaxCyte CHO A Feed (0.5% yeastolate, 2.5% CHO-CD  
278 Efficient Feed A, 2 g/L glucose, 0.25 mM GlutaMAX). The media was harvested 8-12 days post-  
279 transfection and filtered. For purification of Y2, media was diluted with an equal volume of Buffer  
280 A (500 mM NaCl, 20 mM sodium NaH<sub>2</sub>PO<sub>4</sub>, 20 mM imidazole) and loaded onto a 1 mL HisTrap

281 column (GE Healthcare). The column was washed with Buffer A and the protein eluted with a  
282 gradient to Buffer B (500 mM NaCl, 20 mM NaH<sub>2</sub>PO<sub>4</sub>, 500 mM imidazole) on an ÄKTA Pure  
283 chromatography system (GE Healthcare). Fractions containing the protein were pooled,  
284 concentrated, and further purified and buffer exchanged on a Superdex 200 10/300 column (GE  
285 Healthcare) equilibrated in PBS (Sigma). Fractions were pooled and concentrated, then flash  
286 frozen in liquid N<sub>2</sub> and stored at -80°C until use. For P1-05, the mAb was purified using a 1 mL  
287 HiTrap Protein A HP column (GE Healthcare). The media was diluted with an equal volume of  
288 Protein A IgG Binding Buffer (Thermo Scientific) and loaded onto the column. The column was  
289 washed with binding buffer, then eluted with a gradient to Protein A IgG Elution Buffer (Thermo  
290 Scientific). To adjust the pH, 55 µl of 1.89 M Tris pH 8 was added per 1 mL fraction. Fab was  
291 generated and purified using the Pierce™ Fab Preparation Kit according to the manufacturer's  
292 instructions (Thermo Scientific). The Fab product in PBS was flash frozen in liquid N<sub>2</sub> and stored  
293 at -80 °C until use.

294

#### 295 **Cloning and expression of Y2 COBRA with a thrombin cleavage site.**

296 Y2 COBRA was cloned into the pBacPAK8 vector in frame with an N-terminal gp67 signal  
297 sequence and C-terminal thrombin cleavage site, T4 fibrin domain, and hexahistidine/StrepTag  
298 II tags. The construct design results in predicted vector supplied sequences of AATNA and  
299 LVPRGSPGSGYIPEAPRDGQAYVRKDGEWVLLSTFLGHHHHHHGGSWHPQFEK at the N-  
300 and C-termini, respectively. Baculovirus was generated using the *flashBac*™ kit according to the  
301 manufacturer's instructions (Mirus Bio). The protein was expressed in 2 L of Sf9 cells at 2×10<sup>6</sup>  
302 cells/mL maintained in ESF921 media (Expression Systems) by adding 25 mL virus per liter of  
303 culture. The media was harvested after 3 days, pH adjusted with NaCl and Tris pH 8, and stored  
304 at -20°C. Prior to purification, the thawed media was filtered and concentrated to 150-200 mL by  
305 tangential flow with a Vivaflow® 200 (Sartorius). The resulting sample was diluted with an equal

306 volume of Buffer A, filtered, and loaded onto a 5 mL HisTrap column (GE Healthcare). The column  
307 was washed with Buffer A and the protein eluted with a gradient to Buffer B. The protein was  
308 pooled, concentrated, and supplemented with 5% glycerol prior to flash freezing and storage at -  
309 80 °C.

310

### 311 **Kinetic assays by biolayer interferometry.**

312 Biolayer interferometry kinetic assays were performed in triplicate on the Octet® Red384 system  
313 (Sartorius) with a buffer containing PBS, 1% BSA, and 0.05% Tween. Anti-penta-HIS biosensors  
314 were immersed in buffer for 120 s, then loaded with 10 µg/mL Y2 for 300 s. The biosensors were  
315 then dipped into buffer for 120 s to obtain a baseline, dipped into buffer containing P1-05 Fab in  
316 a dilution series ranging from 54 nM to 0.67 nM for 300 s, and buffer for 600 s to measure  
317 dissociation. The data were processed in the Octet Data Analysis HT software v7 (Sartorius).  
318 Each curve was reference subtracted, aligned to the baseline, and aligned for inter-step correction  
319 through the dissociation step for each curve. Each replicate was fit globally for well-resolved  
320 curves in the dilution series using a 1:1 binding model. Parameters were optimized based on the  
321  $R^2$ ,  $\chi^2$ , and individual  $K_D$  error values to maximize the goodness of fit. The final reported  $K_D$  value  
322 (98.5±32.3 pM) represents the mean ± standard deviation of three independent experiments.

323

### 324 **Electron microscopy of the Y2+P1-05 complex.**

325 The protein samples were thawed on ice. To generate the immune complex, P1-05 Fab and Y2  
326 COBRA produced in CHO cells were combined in a 3:1 Fab:HA trimer ratio and incubated at room  
327 temperature for 1 hr. For negative stain analysis, the immune complex was deposited at 15 µg/mL  
328 onto carbon-coated, glow-discharged, 400 mesh copper grids (EMS) and stained with 2% w/v  
329 uranyl formate. The sample was imaged on an Arctica Talos 200C electron microscope (FEI)  
330 operating at 73,000x nominal magnification with a Falcon II direct electron detector and a CETA

331 4k camera (FEI). Micrographs were collected with Legimon and particles were picked using a  
332 difference of Gaussians particle picker and processed with Appion (31–33). Particles were  
333 classified in 2D and 3D in Relion 3.0 and Cryosparc2 and reconstructed in 3D in Cryosparc2 (34,  
334 35). Figures were made in UCSF Chimera (36).

335

### 336 **Single-cell V(D)J sequencing and analysis.**

337 PBMCs were stained with the following antibodies and proteins for flow sorting: anti-CD19-APC  
338 (1:10 dilution, clone HIB19, cat. no. 982406, BioLegend), anti-IgD-FITC (1:20 dilution, clone IA6-  
339 2, cat. no. 348206, BioLegend), anti-IgM-FITC (1:20 dilution, clone MHM-88, cat. no. 314506,  
340 BioLegend), Ghost Dye Red (1:1000), Y2-PE (1:20 dilution), and Y2-BV605 (1:20). AviTagged  
341 Y2 COBRA HA proteins containing the Y98F mutation to reduce sialic acid binding were  
342 biotinylated using the BirA biotin-protein ligase in the BirA500 kit (Avidity) and complexed to  
343 streptavidin-fluorophores SA-PE (1:500 dilution, cat. no. S866, Thermo Fisher) and SA-BV605  
344 (1:250 dilution, cat. no. 405229, BioLegend). CD19<sup>+</sup>IgM/IgD<sup>-</sup>PE<sup>+</sup>BV605<sup>+</sup> double-positive, antigen-  
345 specific B cells were flow sorted on the MoFlo Astrios and resuspended in PBS+0.04% BSA.  
346 These cells were then used to generate Single Cell 5' v2 Dual Index V(D)J libraries using the 10X  
347 Chromium Next GEM Single Cell 5' Reagent Kit v2 (10X Genomics). Libraries were then  
348 sequenced using a NextSeq 550 sequencer (Illumina). Single-cell V(D)J FASTQ files were  
349 generated and demultiplexed using Cell Ranger v4.0.0 and data were visualized using the Loupe  
350 VDJ v3.0.0 browser. Only B cells with intact variable regions and paired heavy and light chains  
351 were considered for downstream analysis.

352

## 353 **Results**

### 354 **COBRA HA-specific B cell responses**

355 To determine the size of the H1 COBRA HA-reactive B cell population within seasonally  
356 vaccinated individuals, total B cells from four vaccinated subjects (2017-2018 cohort) were

357 stimulated on an irradiated feeder layer as previously described (24). B cell supernatants were  
358 assayed for activity against A/California/04/2009 HA, P1 COBRA HA, and X6 COBRA HA  
359 recombinant proteins by ELISA. As expected, HA- and COBRA HA-reactive IgG titers were higher  
360 in day 21 post-vaccination samples compared to those obtained pre-vaccination (**Figure 1**).  
361 Comparisons of A/California/04/2009 HA-reactive IgG titers to those of P1 HA- and X6 HA-  
362 reactive IgGs indicated that binding to A/California/04/2009 HA protein was consistently higher.  
363 The majority of subjects demonstrated significant P1 HA-reactive IgG titers that, while lower than  
364 A/California/04/2009 HA-reactive IgG titers, were higher than or equivalent to X6 HA-reactive IgG  
365 titers in three of four subjects. The disparity in antibody titers between natural A/California/04/2009  
366 HA- and COBRA HA-reactive proteins may be attributed to the relatively high abundance of  
367 pandemic strain-specific antibodies, and the absence of these potential binding epitopes on the  
368 H1 COBRA HA proteins. Moreover, the degree of similarity of each COBRA HA to the  
369 A/California/04/2009 HA appeared to be reflected in the degree to which reactive IgG titers were  
370 elicited. Namely, P1 COBRA HA, representing pandemic-like human and swine H1 HA sequences,  
371 demonstrates 84.63% identity to A/California/04/2009 HA, whereas X6 HA, representing  
372 seasonal-like H1 HA sequences, demonstrated a lower 80.53% identity to A/California/04/2009  
373 HA.

374

### 375 **Lineage analysis of pre-existing COBRA HA-specific mAbs**

376 To further probe the pre-existing B cell response to COBRA HA antigens, we isolated 26 mAbs  
377 from five additional human subjects vaccinated with the 2017-2018 quadrivalent influenza vaccine  
378 within the same cohort using A/California/04/2009 HA and P1 COBRA HA as screening antigens.  
379 The antibody-encoding genes were sequenced, and the results indicated the usage of a diverse  
380 set of immunoglobulin V genes across the entire panel (**Figure 2, Table S1**). When comparing  
381 usage of heavy chain genes,  $V_H1$ ,  $V_H3$ ,  $V_H4$ , and  $V_H5$  gene families were represented (**Figure 2A**).  
382 Approximately 50% of all mAbs utilized a gene from the  $V_H3$  family, and approximately another



383 50% utilized a gene from the  $V_{H4}$  family. In the light chain, for those mAbs utilizing the kappa  
384 chain, a significant proportion utilized genes  $V_{K3-11}$  and  $V_{K3-15}$ . The remainder used  $V$  genes  
385  $V_{K3-20}$  or those from  $V_{K1}$  or  $V_{K2}$  families. mAbs utilizing the lambda chain used predominantly  
386  $V_{L3-21}$  and  $V_{L2-14}$ . Paired heavy and light chain  $V$  genes showed variation across the antibody  
387 panel, with the  $V_{H3-7}:V_{K3-15}$  and  $V_{H4-39}:V_{L2-14}$  pairings being the most abundant for kappa- and  
388 lambda chain-utilizing mAbs, respectively (**Figure 2B**). The lengths of the heavy and light chain  
389 junctions ranged from 12-24 amino acids for the heavy chain, 10-12 amino acids for the kappa  
390 chain, and 12-14 amino acids for the lambda chain (**Figure 2C**). The percent identities of the  
391 variable genes to the germline sequence had averages of 93% for both the heavy and kappa  
392 chains, and 96% for the lambda chain (**Figure 2C**).

393

#### 394 **Binding analysis of COBRA HA-specific human mAbs**

395 The majority of isolated mAbs demonstrated high binding to A/California/04/2009 HA protein by  
396 ELISA, with an average  $EC_{50}$  of 30 ng/mL (**Figure 3A, Figure S1**). Of these A/California/04/2009  
397 HA protein-reactive mAbs, only a subset demonstrated binding to the P1 and X6 COBRA HA  
398 proteins. mAbs P1-02, P1-05, and 163-20 showed reactivity against the P1 COBRA protein, and  
399 mAbs CA09-26, CA09-30, CA09-45, P1-02, and P1-05 demonstrated significant binding to the  
400 X6 COBRA protein. The limited mAb binding to P1 and X6 COBRA proteins correlated with the  
401 lower reactive B cell frequencies to these respective HAs in **Figure 1**. No binding was observed  
402 for any mAb to the H3 subtype HA HK14 or to an irrelevant antigen control (**Figure S1**). Recently,  
403 a next-generation H1 COBRA protein, Y2, was generated, which shares 97.5% sequence identity  
404 with A/California/04/2009 HA (**Figure 4**) (37). All mAbs had similar  $EC_{50}$  values and reactivity to  
405 the Y2 COBRA protein compared to A/California/04/2009 HA protein (**Figure 3A, Figure S1**). We  
406 also determined if mAbs target the stem region by utilizing a chimeric HA protein bearing a H6  
407 HA head and a H1 HA stem (cH6/1) (**Figure 3A**). mAb P1-05 bound to the chimeric protein with  
408 high affinity, suggesting this mAb target the stem region of the H1 HA protein. These results

409 indicate that 2017-2018 QIV-vaccinated subjects developed mAbs with potent binding to the 2009  
410 pandemic-like Y2 COBRA HA protein, and each of these subjects produced at least one mAb with  
411 reactivity against one or more homosubtypic COBRA HAs. Based on these data and the B cell  
412 screening data, COBRA-reactive B cells constitute a major portion of the human B cell response  
413 to influenza vaccination, and COBRA HA antigens can likely recall B cells targeting both the head  
414 and stem regions.

415

### 416 **Functional analysis of COBRA HA-specific mAbs**

417 To characterize the functional activities of the isolated mAbs, HAI and neutralizing activities were  
418 assessed (**Figure 3B, 3C, S2**). The majority of mAbs showed HAI activity against the pandemic-  
419 like A/Michigan/45/2015 virus (**Figure 3B**). These data are consistent with the fact that most mAbs  
420 bound the head domain of A/California/04/2009 HA (**Figure 3A**). Of those mAbs with the highest  
421 HAI activity of the panel against the recent pandemic-like A/Michigan/45/2015 virus, CA09-26 and  
422 CA09-45 were tested for HAI against two pre-pandemic H1 viruses as these mAbs bind the X6  
423 HA COBRA, which incorporates pre-pandemic sequences, and both target the HA protein head  
424 domain. CA09-26 had HAI activity against A/New Caledonia/20/1999 and A/Brisbane/59/2007  
425 viruses, while CA09-45 had HAI activity against A/New Caledonia/20/1999, and no activity against  
426 A/Brisbane/59/2007 (**Figure 3B**). We next assessed neutralizing activity against  
427 A/California/07/2009 (**Figure 3C, S2**). Approximately 60% of mAbs (16/26 mAbs) neutralized the  
428 pandemic A/California/07/2009 virus (A/CA/09). Notably, mAbs CA09-26 and CA09-45 were  
429 among the most potent mAbs in the panel with half-maximal inhibitory concentrations ( $IC_{50}$ s) of  
430 0.014  $\mu$ g/mL and 0.032  $\mu$ g/mL, respectively. These two mAbs were also tested for neutralizing  
431 activity against A/New Caledonia/20/1999 and A/Brisbane/59/2007 (**Figure 3C**). They had  $IC_{50}$   
432 values of 0.081  $\mu$ g/mL and 0.286  $\mu$ g/mL, respectively, against A/New Caledonia/20/1999,  
433 indicating potent neutralization activity (**Figure S2**). However, these two mAbs did not

434 demonstrate neutralizing activity against the A/Brisbane/59/2007 virus, in accordance with the  
435 observation that little to no HAI activity was observed for the same strain.

436

437 Neutralization-independent, Fc-dependent activities are an important aspect of anti-influenza  
438 antibodies that bind both the head and stem domains (38–40). Stem-binding antibodies elicited  
439 by P1 HA vaccination also demonstrate Fc activity by inducing cellular cytotoxicity (16). To  
440 determine the extent of one such Fc effector function, antibody-dependent phagocytosis (ADP)  
441 activity was measured by assessing the capacity for the monocytic THP-1 cell line to phagocytose  
442 Y2 COBRA HA-coated beads through mAb binding (**Figure 5**). The entire mAb panel  
443 demonstrated ADP activity relative to the negative mAb control. These included both  
444 neutralization/HAI-positive mAbs as well as mAbs that did not demonstrate significant HAI or  
445 neutralization activity.

446

#### 447 **Multiple distinct epitopes on the A/California/04/2009 HA are bound by isolated mAbs.**

448 To determine the epitopes bound by the panel of 27 mAbs isolated from these vaccinated subjects,  
449 biolayer interferometry-based epitope binning was utilized as previously described (24, 41).  
450 Biosensors were loaded with A/California/04/2009 HA protein, associated with one mAb, and then  
451 exposed to a second mAb to determine mAb competition (**Figure 6**). Control mAbs Ab6649, 5J8,  
452 and CR6261 were utilized to determine the relative locations of each epitope. Ab6649 binds the  
453 lateral patch, proximal to the Sa antigenic site; MAb 5J8 binds the receptor-binding site (RBS),  
454 comprising antigenic sites Sb and Ca2; and mAb CR6261 binds a conserved portion of the stem  
455 region found for all group 1 viruses (**Figure 6A**). Five distinct epitopes on A/California/04/2009  
456 HA protein were distinguished (**Figure 6B**). Of the epitopes on the globular head domain, two  
457 known major epitopes, termed epitope 1 and epitope 3, corresponding to those of Ab6649 and  
458 5J8, respectively, were identified. The position of one predominantly bound epitope, epitope 2,  
459 could not be identified by epitope binning with the control mAbs used. Three other epitopes,

460 characterized only by the competition of a single mAb to itself, were epitopes 4 and 5, which  
461 correspond to mAbs CA09-38 and P1-05, respectively. No mAbs competed with CR6261,  
462 indicating that although mAb P1-05 targets the stem, as evidenced by binding to the cH6/1 protein  
463 **(Figure 3, S1)**, this mAb targets a different epitope on the stem of the H1 HA protein. Overall,  
464 these data suggest that the epitopes bound by mAbs from vaccinated subjects are comprised, in  
465 part, of conserved sites on the head domain, such as those involving the RBS and the lateral  
466 patch, in addition to portions of the stem.

467

468 Epitope 2 encompassed the binding regions of several mAbs, yet did not compete significantly  
469 with any of the control mAbs used. To further elucidate its position on the A/California/04/2009  
470 HA protein, escape mutants of the A/California/07/2009 virus were generated **(Figure 7)**.  
471 Following sequencing of the HA gene of these escape mutant viruses, a number of cell adaptation  
472 mutations (G165E and S193P) were identified, in addition to escape mutations. The positions of  
473 these escape mutations correlated with the expected positions based on the BLI-based epitope  
474 binning assay. I176F, D178N, and L201I mutations were found in viruses passaged with the 163-  
475 13 mAb that binds epitope 1. 163-13 competed with the Ab6649 antibody, which makes contacts  
476 with the Sa antigenic site, and also appears to sterically hinder the Ca2 antigenic site. These  
477 mutations correspond to the Ca2 site, and therefore corroborate the epitope binning results for  
478 epitope 1. Two other mAbs binding to epitope 1, 163-20 and CA09-22, generated a mutation  
479 proximal to Sa, K129N. Interestingly, CA09-30, an epitope 2-binding mAb, also led to the  
480 generation of the K129N mutation, also found in escape mutants to epitope 1. This mutation  
481 (called K136N with H1 numbering) has previously been reported to introduce a glycosylation site,  
482 which may lead to shielding of the antibody epitope (42). It is possible that this epitope is present  
483 between epitopes 1 and 3 on the HA head domain, and that this K129N mutation may be a method  
484 of virus escape from mAbs that bind in different orientations within these distinct epitopes. No

485 escape mutations were found for any mAbs in epitope 3. Epitopes 4 and 5, which are defined by  
486 mAbs CA09-38 and P1-05, respectively, did not generate any escape mutations.

487

488 Epitope 5 is located on the stem of the H1 HA protein yet does not overlap with the conserved  
489 stem epitope of mAb CR6261 (**Figure 3A, 6**). To determine the epitope of mAb P1-05, we  
490 generated a complex of Y2 HA bound to P1-05 Fab fragments and evaluated its structure by  
491 negative-stain electron microscopy (EM) (**Figure 8A, 8B**). The 2D class averages revealed that  
492 P1-05 binds to the base of the HA stem in an upward angle (**Figure 8B**). We also observed that  
493 insertion of residues between the Y2 C-terminus and the Foldon trimerization domain disrupted  
494 mAb P1-05 binding, potentially due to trimer splaying and disruption of this membrane proximal  
495 epitope (**Figure 8C**). Recently, a similar class of mAbs targeting this region on HA, termed the  
496 “anchor” epitope, was discovered, and such mAbs protect against H1N1 infection in mice (43, 44).  
497 Anchor mAbs do not compete with known stem mAbs and utilize  $V_{\kappa 3-11}$  or  $V_{\kappa 3-15}$  kappa V genes  
498 that encode a germline encoded NWP motif in the CDR3 region (44). The restricted light chain  
499 usage can pair with  $V_{H3-23}$ ,  $V_{H3-30}/V_{H3-30-3}$ , and  $V_{H3-48}$  V genes. mAb P1-05 utilizes  $V_{\kappa 3-11}$   
500 paired with  $V_{H3-23}$ . Furthermore, it was also recently reported that binding of anchor mAbs is  
501 disrupted by the use of a GCN4 trimerization domain (44), which has different spacing than the  
502 Foldon domain, which matches our data with the disruption of binding observed in **Figure 8C**.  
503 These observations are critical for subunit HA protein vaccine development as they indicate the  
504 importance of antigen design, stability, and the incorporation of mAb binding affinity studies to  
505 ensure that important epitopes are properly displayed on candidate vaccine antigens.

506

### 507 **Repertoire analysis of Y2-specific B cells**

508 To further probe the repertoire of pre-existing COBRA HA-specific B cells and to determine the  
509 prevalence of each mAb in the public antibody domain, we conducted a single-cell RNA  
510 sequencing experiment using B cells from a single subject vaccinated with the 2019-2020

511 seasonal influenza vaccine. Approximately 3000 CD19<sup>+</sup>IgM<sup>-</sup>IgD<sup>-</sup> B cells positive for the Y2  
512 COBRA HA were sorted and subjected to 10X barcoding (**Figure 9, S3**). Prior to loading onto the  
513 10X controller, sorted Y2-specific cells were supplemented with the CA09-26 hybridoma clone as  
514 a loading control. 69 unique paired heavy and light chains were obtained following data  
515 demultiplexing and analysis compared to the human genome database. Similar to the mAb  
516 sequencing, the  $V_H1$  and  $V_H4$  gene families were highly prevalent in the B cell repertoire. In  
517 particular,  $V_H4-39$  and  $V_H4-59$  were prevalent in both mAb sequencing and B cell sequencing  
518 results. We also identified several additional mAbs utilizing the  $V_H3-23$  gene, with one in particular  
519 (clone 70) having an NWP motif in a paired  $V_K3-15$  light chain, consistent with an additional  
520 anchor-like mAb (44) (**Table S1**). A fraction of  $V_H1-69$  genes were also identified, which is utilized  
521 by mAbs targeting the stalk epitope. Hence, we observed a relatively diverse repertoire of binding  
522 antibodies including both central stalk and anchor targeting mAbs.

523

## 524 **Discussion**

525 H1 COBRA HA antigens have been successful at broadening the antibody response compared  
526 to wild-type HA sequences in naïve and pre-immune mouse and ferret models of influenza  
527 infection (22, 37). However, pre-existing immunity to influenza in humans remains a major  
528 challenge to overcome due to repeated previous exposure to the influenza HA protein during  
529 infection and vaccination events. In this study, we sought to determine the extent of the H1  
530 subtype COBRA HA-reactive pre-existing B cell repertoire in human subjects to predict recall  
531 responses as COBRA HA antigens move toward clinical trials. At the oligoclonal B cell level, pre-  
532 existing B cell responses were observed for P1 and X6 COBRA antigens in individuals vaccinated  
533 with the 2017-2018 seasonal influenza vaccine, which incorporated the pandemic-like  
534 A/Michigan/45/2015 vaccine strain. COBRA HA-reactive B cell responses were lower than those  
535 observed for A/California/04/2009 HA protein, likely due to loss of strain-specific variable head  
536 epitopes and incorporation of seasonal pre-pandemic and swine HA sequences in the X6 and P1

537 antigens, respectively. mAbs isolated against A/California/04/2009 HA protein utilized a diverse  
538 gene repertoire and only a small subset reacted with P1 and X6 COBRA antigens. In contrast,  
539 the mAb binding profile to the recently described Y2 COBRA HA, which utilizes 2009 pandemic-  
540 like H1 sequences from 2014-2016, was similar to that observed for the A/California/04/2009 HA  
541 protein. The majority of the mAbs had HAI activity and neutralizing activity against  
542 A/Michigan/45/2015 and A/California/07/2009, and two head-binding mAbs that bind the X6  
543 protein, CA09-26 and CA09-45, had HAI activity and neutralizing activity against the pre-  
544 pandemic strain A/New Caledonia/20/1999. These data suggest that the COBRA X6 HA-reactive  
545 mAbs are mainly endowed with functional activity against both pre-pandemic and pandemic-like  
546 H1 viruses. Overall, the amino acid similarity of COBRA HA antigens to A/California/04/2009 HA  
547 correlated with high B cell and mAb reactivity. In addition to binding, neutralization, and HAI  
548 activity, we also assessed if COBRA HA-reactive mAbs had Fc-mediated functions, namely ADP,  
549 and virtually all mAbs were able to induce THP-1 phagocytosis of Y2-coated beads.

550         Several epitopes on the H1 HA protein have been previously defined (10), and we  
551 determined mAb epitopes on the A/California/04/2009 HA protein using biolayer interferometry.  
552 The majority of the mAbs targeted three head-binding epitopes on the Sa and Sb/Ca2 sites, and  
553 an undefined epitope identified through the generation of escape mutations. CA09-38 did not  
554 exhibit HAI or neutralizing activity, nor did it bind the cH6/1 HA, suggesting that this mAb targets  
555 an undefined non-neutralizing epitope on the head region. We discovered that P1-05 targets a  
556 unique epitope on the H1 HA stem region, and this epitope is similar to the recently described  
557 anchor epitope (44). Based on these data, while COBRA antigens were primarily designed to  
558 induce broadly reactive antibodies to the head domain, these antigens will likely also recall  
559 broadly reactive anchor mAbs in humans in addition to head-based recall and *de novo* antibody  
560 responses. Further repertoire analysis in a subject vaccinated with the 2019-2020 seasonal  
561 influenza vaccine identified additional anchor-like mAb sequences, as well as similar sequences

562 to our mAbs targeting the head domain from the 2017-2018 season, indicating that the COBRA-  
563 reactive B cell population is similar across subjects and influenza vaccine seasons.

564           These data provide evidence that a pre-immune population with exposure to the seasonal  
565 influenza virus vaccine exhibits B cell reactivity towards conserved epitopes present on COBRA  
566 HA antigens. As the COBRA HA platform enters clinical trials, it is likely that head-specific and  
567 some stem-specific antibodies will be elicited as part of a recall response. Moreover, the antibody  
568 epitopes identified in this work overlap in part with those previously identified on the head domain  
569 near the RBS and the lateral patch, in addition to those on the stem. These epitopes are the focus  
570 of future structural studies, particularly for those mAbs that cross-react with the X6 COBRA HA  
571 as well as with the HA stem domain. Our data also exemplify the importance of structural analysis  
572 of protein epitopes to ensure epitopes that elicit broadly neutralizing antibodies, such as the  
573 anchor epitope, remain intact following design optimization for subunit HA vaccines.



574 **Funding statement**

575 This work was supported by the Collaborative Influenza Vaccine Innovation Centers (CIVIC)  
576 contract by the National Institute of Allergy and Infectious Diseases, a component of the NIH,  
577 Department of Health and Human Services, under contracts 75N93019C00052 (G.A.S., T.M.R.,  
578 R.M.D., J.J.M.) and 75N93019C00051 (A.B.W.). J.J.M. is partially supported by National Institutes  
579 of Health grant K01OD026569. F.R. was supported by National Institutes of Health NIGMS grant  
580 GM109435. T.M.R is supported as an Eminent Scholar by the Georgia Research Alliance.

581

582 **Data availability**

583 The 3D reconstruction of Y2 + P1-05 was deposited to the Electron Microscopy Data Bank under  
584 deposition ID D\_1000260135.

585 **References**

586

- 587 1. Iuliano AD, Roguski KM, Chang HH, Muscatello DJ, Palekar R, Tempia S, Cohen C,  
588 Gran JM, Schanzer D, Cowling BJ, Wu P, Kyncl J, Ang LW, Park M, Redlberger-Fritz M,  
589 Yu H, Espenhain L, Krishnan A, Emukule G, van Asten L, Pereira da Silva S,  
590 Aungkulanon S, Buchholz U, Widdowson M-A, Bresee JS, Azziz-Baumgartner E, Cheng  
591 P-Y, Dawood F, Foppa I, Olsen S, Haber M, Jeffers C, MacIntyre CR, Newall AT, Wood  
592 JG, Kundi M, Popow-Kraupp T, Ahmed M, Rahman M, Marinho F, Sotomayor Proschle  
593 CV, Vergara Mallegas N, Luzhao F, Sa L, Barbosa-Ramírez J, Sanchez DM, Gomez LA,  
594 Vargas XB, Acosta Herrera aBetsy, Llanés MJ, Fischer TK, Krause TG, Mølbak K,  
595 Nielsen J, Trebbien R, Bruno A, Ojeda J, Ramos H, an der Heiden M, del Carmen  
596 Castillo Signor L, Serrano CE, Bhardwaj R, Chadha M, Narayan V, Kosen S, Bromberg  
597 M, Glatman-Freedman A, Kaufman Z, Arima Y, Oishi K, Chaves S, Nyawanda B, Al-  
598 Jarallah RA, Kuri-Morales PA, Matus CR, Corona MEJ, Burmaa A, Darmaa O, Obtel M,  
599 Cherkaoui I, van den Wijngaard CC, van der Hoek W, Baker M, Bandaranayake D,  
600 Bissielo A, Huang S, Lopez L, Newbern C, Flem E, Grøneng GM, Hauge S, de Cosío FG,  
601 de Moltó Y, Castillo LM, Cabello MA, von Horoch M, Medina Osis J, Machado A, Nunes  
602 B, Rodrigues AP, Rodrigues E, Calomfirescu C, Lupulescu E, Popescu R, Popovici O,  
603 Bogdanovic D, Kostic M, Lazarevic K, Milosevic Z, Tiodorovic B, Chen M, Cutter J, Lee V,  
604 Lin R, Ma S, Cohen AL, Treurnicht F, Kim WJ, Delgado-Sanz C, de mateo Ontañón S,  
605 Larrauri A, León IL, Vallejo F, Born R, Junker C, Koch D, Chuang J-H, Huang W-T, Kuo  
606 H-W, Tsai Y-C, Bundhamcharoen K, Chittaganpitch M, Green HK, Pebody R, Goñi N,  
607 Chiparelli H, Brammer L, Mustaquim D. 2018. Estimates of global seasonal influenza-  
608 associated respiratory mortality: a modelling study. *Lancet* 391:1285–1300.
- 609 2. Flerlage T, Boyd DF, Meliopoulos V, Thomas PG, Schultz-Cherry S. 2021. Influenza virus  
610 and SARS-CoV-2: pathogenesis and host responses in the respiratory tract. *Nat Rev*

- 611 Microbiol 19:425–441.
- 612 3. Jester BJ, Uyeki TM, Jernigan DB. 2020. Fifty Years of Influenza A(H3N2) Following the  
613 Pandemic of 1968. *Am J Public Health* 110:669–676.
- 614 4. LaRussa P. 2011. Pandemic novel 2009 H1N1 influenza: what have we learned? *Semin  
615 Respir Crit Care Med* 32:393–399.
- 616 5. Webster RG, Govorkova EA. 2014. Continuing challenges in influenza. *Ann N Y Acad Sci*  
617 1323:115–139.
- 618 6. Krammer F, Smith GJD, Fouchier RAM, Peiris M, Kedzierska K, Doherty PC, Palese P,  
619 Shaw ML, Treanor J, Webster RG, García-Sastre A. 2018. Influenza. *Nat Rev Dis Prim*  
620 4:1–21.
- 621 7. Soema PC, Kompier R, Amorij JP, Kersten GFA. 2015. Current and next generation  
622 influenza vaccines: Formulation and production strategies. *Eur J Pharm Biopharm*  
623 94:251–263.
- 624 8. Zost SJ, Parkhouse K, Gumina ME, Kim K, Perez SD, Wilson PC, Treanor JJ, Sant AJ,  
625 Cobey S, Hensley SE. 2017. Contemporary H3N2 influenza viruses have a glycosylation  
626 site that alters binding of antibodies elicited by egg-adapted vaccine strains. *Proc Natl  
627 Acad Sci U S A* 114:12578–12583.
- 628 9. Chang D, Zaia J. 2019. Why glycosylation matters in building a better flu vaccine. *Mol  
629 Cell Proteomics* 18:2348–2358.
- 630 10. Nagashima KA, Mousa JJ. 2021. Next-Generation Influenza HA Immunogens and  
631 Adjuvants in Pursuit of a Broadly Protective Vaccine. *Viruses* .
- 632 11. Zost SJ, Wu NC, Hensley SE, Wilson IA. 2019. Immunodominance and Antigenic  
633 Variation of Influenza Virus Hemagglutinin: Implications for Design of Universal Vaccine  
634 Immunogens. *J Infect Dis* 219:S38–S45.
- 635 12. Allen JD, Ray S, Ross TM. 2018. Split inactivated COBRA vaccine elicits protective  
636 antibodies against H1N1 and H3N2 influenza viruses. *PLoS One* 13:1–15.

- 637 13. Darricarrère N, Pougatcheva S, Duan X, Rudicell RS, Chou T, DiNapoli J, Ross TM,  
638 Alefantis T, Vogel TU, Kleanthous H, Wei C-J, Nabel GJ. 2018. Development of a Pan-  
639 H1 Influenza Vaccine. *J Virol* 92:1–14.
- 640 14. Bar-Peled Y, Huang J, Nuñez IA, Pierce SR, Ecker JW, Ross TM, Mousa JJ. 2019.  
641 Structural and antigenic characterization of a computationally-optimized H5  
642 hemagglutinin influenza vaccine. *Vaccine* 37:6022–6029.
- 643 15. Carter DM, Darby CA, Johnson SK, Carlock MA, Kirchenbaum GA, Allen JD, Vogel TU,  
644 Delagrave S, DiNapoli J, Kleanthous H, Ross TM. 2017. Elicitation of Protective  
645 Antibodies against a Broad Panel of H1N1 Viruses in Ferrets Preimmune to Historical  
646 H1N1 Influenza Viruses. *J Virol* 91:1–16.
- 647 16. Sautto GA, Kirchenbaum GA, Abreu RB, Ecker JW, Pierce SR, Kleanthous H, Ross TM.  
648 2020. A Computationally Optimized Broadly Reactive Antigen Subtype-Specific Influenza  
649 Vaccine Strategy Elicits Unique Potent Broadly Neutralizing Antibodies against  
650 Hemagglutinin. *J Immunol* 204:375–385.
- 651 17. Saunders-Hastings PR, Krewski D. 2016. Reviewing the History of Pandemic Influenza:  
652 Understanding Patterns of Emergence and Transmission. *Pathog (Basel, Switzerland)*  
653 5:66.
- 654 18. Caton AJ, Brownlee GG, Yewdell JW, Gerhard W. 1982. The antigenic structure of the  
655 influenza virus A/PR/8/34 hemagglutinin (H1 subtype). *Cell* 31:417–427.
- 656 19. Krause JC, Tsibane T, Tumpey TM, Huffman CJ, Basler CF, Crowe JE. 2011. A Broadly  
657 Neutralizing Human Monoclonal Antibody That Recognizes a Conserved, Novel Epitope  
658 on the Globular Head of the Influenza H1N1 Virus Hemagglutinin. *J Virol* 85:10905–  
659 10908.
- 660 20. Raymond DD, Bajic G, Ferdman J, Suphaphiphat P, Settembre EC, Moody MA, Schmidt  
661 AG, Harrison SC. 2017. Conserved epitope on influenza-virus hemagglutinin head  
662 defined by a vaccine-induced antibody. *PNAS* 115:168–173.

- 663 21. Watanabe A, McCarthy KR, Kuraoka M, Schmidt AG, Adachi Y, Onodera T, Tonouchi K,  
664 Caradonna TM, Bajic G, Song S, McGee CE, Sempowski GD, Feng F, Urick P, Kepler  
665 TB, Takahashi Y, Harrison SC, Kelsoe G. 2019. Antibodies to a Conserved Influenza  
666 Head Interface Epitope Protect by an IgG Subtype-Dependent Mechanism. *Cell*  
667 177:1124-1135.e16.
- 668 22. Carter DM, Darby CA, Lefoley BC, Crevar CJ, Alefantis T, Oomen R, Anderson SF,  
669 Strugnell T, Cortés-Garcia G, Vogel TU, Parrington M, Kleanthous H, Ross TM. 2016.  
670 Design and Characterization of a Computationally Optimized Broadly Reactive  
671 Hemagglutinin Vaccine for H1N1 Influenza Viruses. *J Virol* 90:4720–4734.
- 672 23. Monto AS, Malosh RE, Petrie JG, Martin ET. 2017. The Doctrine of Original Antigenic  
673 Sin: Separating Good from Evil. *J Infect Dis* 215:1782–1788.
- 674 24. Bar-Peled Y, Diaz D, Pena-Briseno A, Murray J, Huang J, Tripp RA, Mousa JJ. 2019. A  
675 potent neutralizing site III-specific human antibody neutralizes human metapneumovirus  
676 in vivo. *J Virol* 93:e00342--19.
- 677 25. Huang J, Diaz D, Mousa JJ. 2020. Antibody recognition of the pneumovirus fusion protein  
678 trimer interface. *PLoS Pathog* 16:1–22.
- 679 26. Ecker JW, Kirchenbaum GA, Pierce SR, Skarlupka AL, Abreu RB, Cooper RE, Taylor-  
680 Mulneix D, Ross TM, Sautto GA. 2020. High-Yield Expression and Purification of  
681 Recombinant Influenza Virus Proteins from Stably-Transfected Mammalian Cell Lines.  
682 *Vaccines* 8:462.
- 683 27. Guthmiller JJ, Dugan HL, Neu KE, Lan LY, Wilson PC. 2019. Human Monoclonal  
684 Antibodies Human Monoclonal Antibodies Methods and Protocols, 2nd ed. Springer New  
685 York, New York, NY.
- 686 28. Brochet X, Lefranc M-P, Giudicelli V. 2008. IMGT/V-QUEST: the highly customized and  
687 integrated system for IG and TR standardized V-J and V-D-J sequence analysis. *Nucleic*  
688 *Acids Res* 36:W503–W508.

- 689 29. Deng Y-M, Spirason N, Iannello P, Jelley L, Lau H, Barr IG. 2015. A simplified Sanger  
690 sequencing method for full genome sequencing of multiple subtypes of human influenza  
691 A viruses. *J Clin Virol* 68:43–48.
- 692 30. O'Rourke SM, Byrne G, Tatsuno G, Wright M, Yu B, Mesa KA, Doran RC, Alexander D,  
693 Berman PW. 2018. Robotic selection for the rapid development of stable CHO cell lines  
694 for HIV vaccine production. *PLoS One* 13:e0197656.
- 695 31. Voss NR, Yoshioka CK, Rademacher M, Potter CS, Carragher B. 2009. DoG Picker and  
696 TiltPicker: Software tools to facilitate particle selection in single particle electron  
697 microscopy. *J Struct Biol* 166:205–213.
- 698 32. Lander GC, Stagg SM, Voss NR, Cheng A, Fellmann D, Pulokas J, Yoshioka C, Irving C,  
699 Mulder A, Lau PW, Lyumkis D, Potter CS, Carragher B. 2009. Appion: An integrated,  
700 database-driven pipeline to facilitate EM image processing. *J Struct Biol* 166:95–102.
- 701 33. Suloway C, Pulokas J, Fellmann D, Cheng A, Guerra F, Quispe J, Stagg S, Potter CS,  
702 Carragher B. 2005. Automated molecular microscopy: The new Legion system. *J Struct*  
703 *Biol* 151:41–60.
- 704 34. Zivanov J, Nakane T, Forsberg BO, Kimanius D, Hagen WJH, Lindahl E, Scheres SHW.  
705 2018. New tools for automated high-resolution cryo-EM structure determination in  
706 RELION-3. *Elife* 7:1–22.
- 707 35. Punjani A, Rubinstein JL, Fleet DJ, Brubaker MA. 2017. cryoSPARC: algorithms for rapid  
708 unsupervised cryo-EM structure determination. *Nat Methods* 14:290–296.
- 709 36. Pettersen EF, Goddard TD, Huang CC, Couch GS, Greenblatt DM, Meng EC, Ferrin TE.  
710 2004. UCSF Chimera - A visualization system for exploratory research and analysis. *J*  
711 *Comput Chem* 25:1605–1612.
- 712 37. Huang Y, França MS, Allen JD, Shi H, Ross TM. 2021. Next Generation of  
713 Computationally Optimized Broadly Reactive HA Vaccines Elicited Cross-Reactive  
714 Immune Responses and Provided Protection against H1N1 Virus Infection. *Vaccines* .

- 715 38. Bangaru S, Lang S, Schotsaert M, Vanderven HA, Zhu X, Kose N, Bombardi R, Finn JA,  
716 Kent SJ, Gilchuk P, Gilchuk I, Turner HL, García-Sastre A, Li S, Ward AB, Wilson IA,  
717 Crowe Jr. JE. 2019. A Site of Vulnerability on the Influenza Virus Hemagglutinin Head  
718 Domain Trimer Interface. *Cell* 177:1136-1152.e18.
- 719 39. Bajic G, Maron MJ, Adachi Y, Onodera T, McCarthy KR, McGee CE, Sempowski GD,  
720 Takahashi Y, Kelsoe G, Kuraoka M, Schmidt AG. 2019. Influenza Antigen Engineering  
721 Focuses Immune Responses to a Subdominant but Broadly Protective Viral Epitope. *Cell*  
722 *Host Microbe* 25:827-835.e6.
- 723 40. Boudreau CM, Yu WH, Suscovich TJ, Talbot HK, Edwards KM, Alter G. 2020. Selective  
724 induction of antibody effector functional responses using MF59-adjuvanted vaccination. *J*  
725 *Clin Invest* 130:662–672.
- 726 41. Huang J, Diaz D, Mousa JJ. 2020. Antibody recognition of the Pneumovirus fusion  
727 protein trimer interface. *PLOS Pathog* 16:e1008942.
- 728 42. Job ER, Deng Y-M, Barfod KK, Tate MD, Caldwell N, Reddiex S, Maurer-Stroh S, Brooks  
729 AG, Reading PC. 2013. Addition of Glycosylation to Influenza A Virus Hemagglutinin  
730 Modulates Antibody-Mediated Recognition of H1N1 2009 Pandemic Viruses. *J Immunol*  
731 190:2169–2177.
- 732 43. Benton DJ, Nans A, Calder LJ, Turner J, Neu U, Lin YP, Ketelaars E, Kallewaard NL,  
733 Corti D, Lanzavecchia A, Gamblin SJ, Rosenthal PB, Skehel JJ. 2018. Influenza  
734 hemagglutinin membrane anchor. *Proc Natl Acad Sci* 115:10112 LP – 10117.
- 735 44. Guthmiller JJ, Han J, Utset HA, Li L, Lan LY-L, Henry C, Stamper CT, Stovicek O,  
736 Gentles L, Dugan HL, Zheng N-Y, Richey ST, Tepora ME, Bitar DJ, Changrob S,  
737 Strohmeier S, Huang M, García-Sastre A, Nachbagauer R, Palese P, Bloom JD,  
738 Krammer F, Coughlan L, Ward AB, Wilson PC. 2021. A public broadly neutralizing  
739 antibody class targets a membrane-proximal anchor epitope of influenza virus  
740 hemagglutinin. *bioRxiv* 2021.02.25.432905.

741

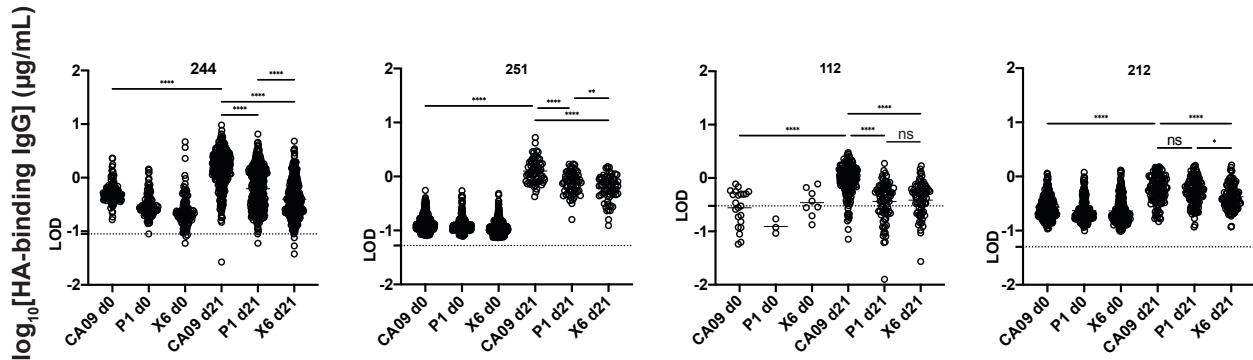

742

743

744 **Figure 1. Binding titers of oligoclonal B cell supernatants pre-vaccination (d0) and 21 days**

745 **post-vaccination (d21) from four representative subjects. IgG titers against CA09 HA (CA09),**

746 **P1 COBRA (P1), and X6 COBRA (X6), are shown for representative subjects receiving the 2017-**

747 **2018 QIV. Supernatants from stimulated PBMCs were screened by ELISA using plates coated**

748 **with the indicated antigen. PBMCs were standardized to 25,000 cells per well. Each circle**

749 **indicates 1 well, the mean is shown as a bar, and the limit of detection (LOD) is indicated by a**

750 **dotted line. LOD was calculated as three times the standard deviation of the lowest concentration**

751 **divided by the slope of the standard curve for each sample, interpolated to its corresponding log**

752 **concentration. \*\*\*\*P<0.0001, \*\*P=0.0062, \*P=0.0216, ns=not significant.**

753



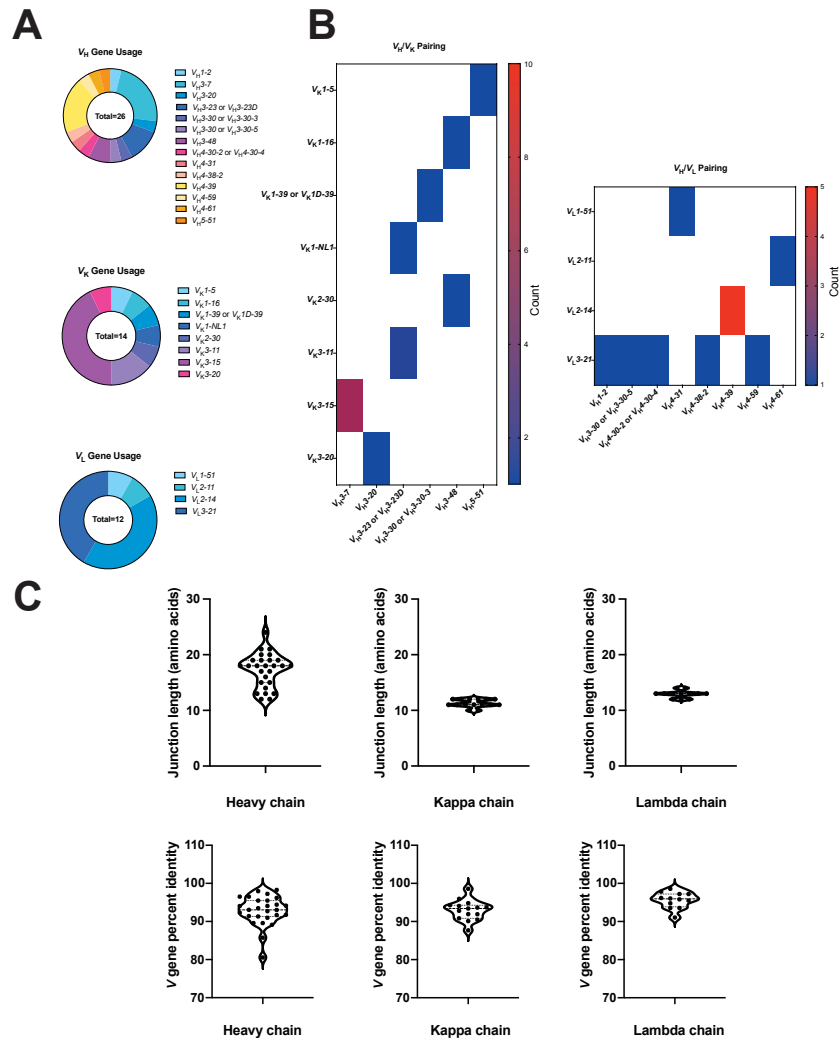

754

755 **Figure 2. Gene usage and junction lengths of isolated mAbs.** (A) The usage of heavy, kappa,  
 756 and lambda chain genes are shown as a proportion of all respective genes from the panel of  
 757 isolated mAbs by sequencing the hybridoma line for each clone. The pairing of heavy and light  
 758 chains is shown in (B), with the number of antibodies corresponding to each pairing shown as a  
 759 heat map. (C) The amino acid lengths of the junction for the heavy and light chains are shown  
 760 (top) alongside the percent identity of the V gene to the germline sequences (bottom).

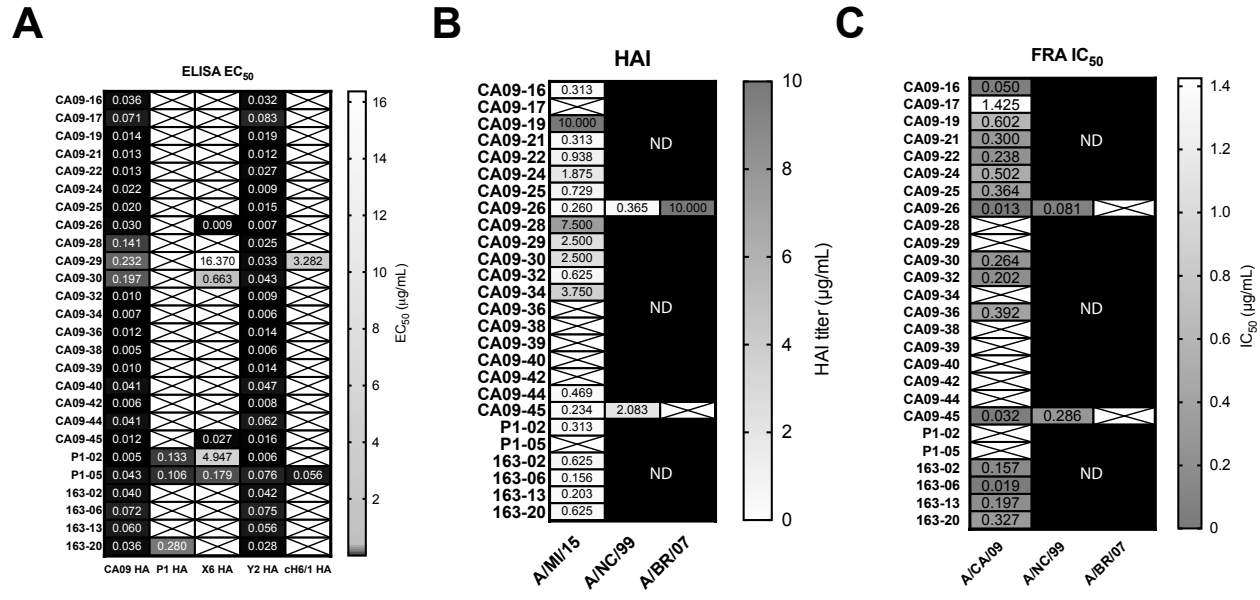

761

762 **Figure 3. Reactivity of mAbs isolated from 2017-2018 QIV-vaccinated subjects.** (A) Half-  
763 maximal effective concentrations ( $EC_{50}$ s) are represented for each mAb. ELISAs were completed  
764 with each mAb serially diluted three-fold. Shown are the  $EC_{50}$  values against CA09 HA (CA09),  
765 P1 COBRA HA, X6 COBRA HA, Y2 COBRA HA, and ch6/1 HA proteins. For the  $EC_{50}$  heat map,  
766 boxes with an X indicate the signal at 20  $\mu$ g/mL did not reach 1.5, or the calculated  $EC_{50}$  was  
767 outside the tested concentration range due to an overall low signal. In (B) boxes with an X indicate  
768 no HAI activity was observed at 10  $\mu$ g/mL. In (C), boxes with an X indicate less than 50%  
769 neutralization at the highest concentration tested or the calculated  $IC_{50}$  was outside the tested  
770 concentration range due to overall low neutralization activity.

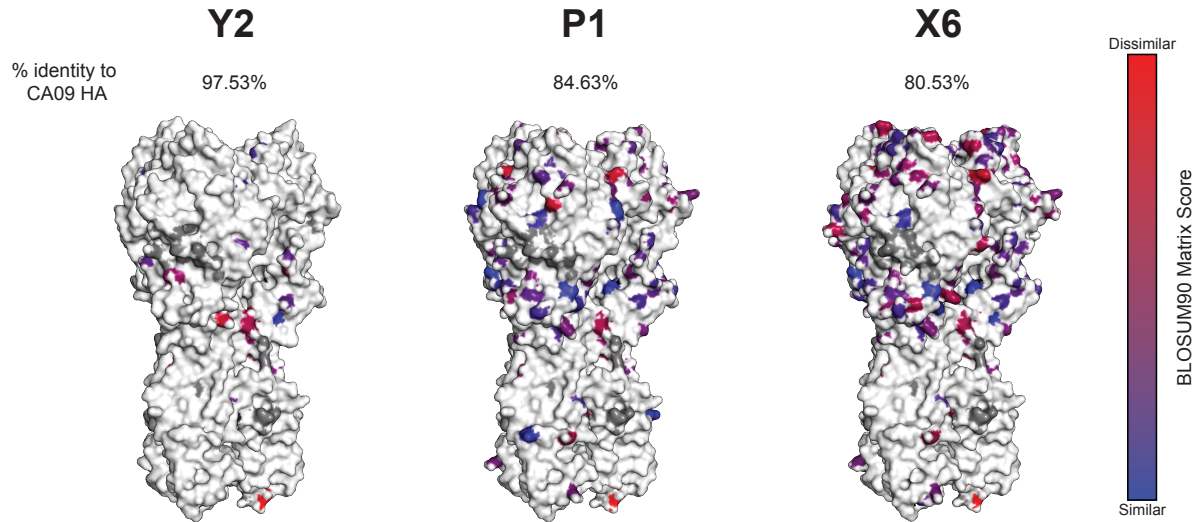

771

772 **Figure 4. Models of H1 COBRAs used in this study.** The models of the H1 subtype COBRAs  
773 used are shown alongside the percent identity to the *A*/California/04/2009 HA. Substitution  
774 mutations are indicated in colors corresponding to the BLOSUM90 matrix score, a measure of  
775 the likelihood of a given amino acid mutation. White residues indicate an identical amino acid as  
776 the *A*/California/04/2009 HA, blue a substitution with a highly similar amino acid, and red a  
777 substitution with a highly dissimilar amino acid. Models were generated using SWISS-MODEL.

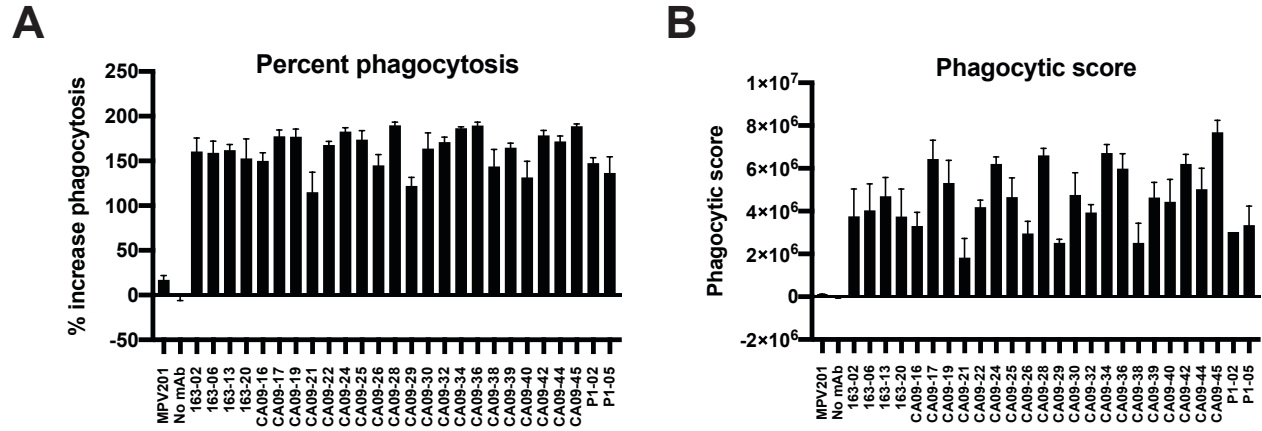

778

779

780 **Figure 5. ADP activity of isolated mAbs.** The percent phagocytosis of Y2-coated beads by  
781 THP-1 cells in the presence of each mAb was assessed using a flow cytometric assay. The  
782 relative percent increase of phagocytic cells for each mAb relative to the no mAb control (A), in  
783 addition to the phagocytic score (B), are shown. Bars represent the average of three replicates,  
784 while errors bars are the standard deviation.

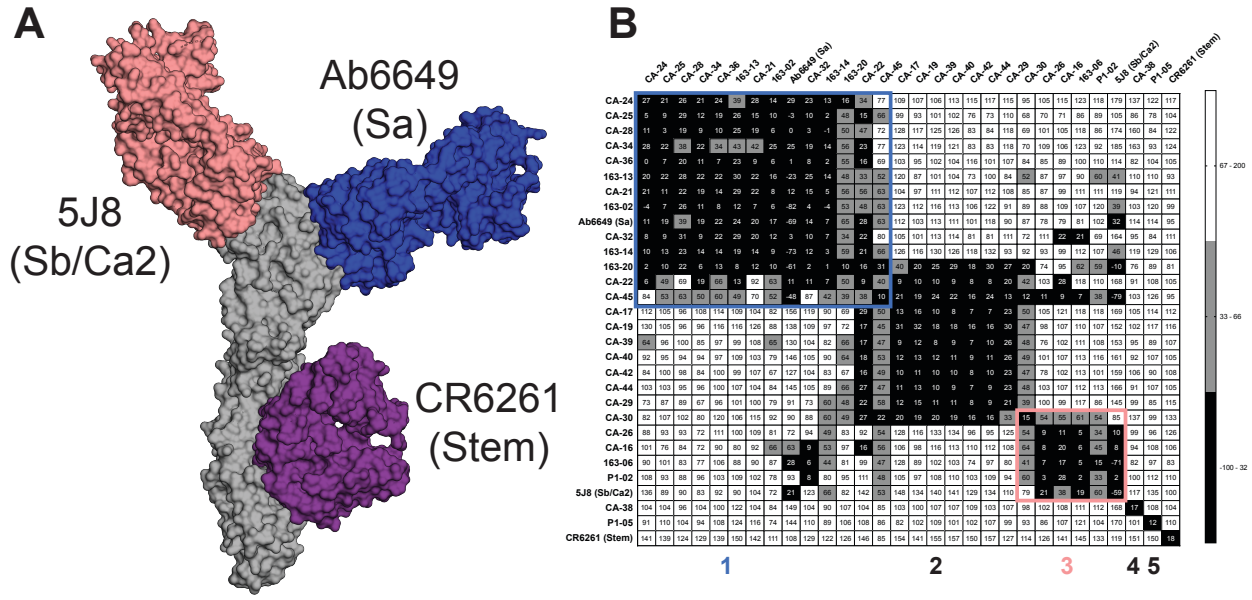

785

786 **Figure 6. Epitope binning identifies five epitopes from human antibodies isolated at 21**  
 787 **days post-vaccination.** (A) Model of A/California/04/2009 HA in complex with three control  
 788 antibodies used for epitope binning. 5J8 and Ab6649 bind the head domain at the conserved RBS  
 789 and lateral patch epitopes, respectively. CR6261 binds the stem domain at a site conserved for  
 790 group 1 viruses. (B) Epitope binning was performed against A/California/04/2009 HA. Competition  
 791 was measured as the percentage of the response from the association of the second antibody  
 792 (horizontal axis) in the presence of the first antibody (vertical axis) as compared to the second  
 793 antibody alone. Black indicates complete competition, gray moderate competition, and white no  
 794 competition. Identified epitopes that have been previously characterized are outlined in blue (for  
 795 the lateral patch) and pink (for the RBS). The antigenic sites of the epitopes of control mAbs  
 796 Ab6649 and 5J8 are shown in parentheses.

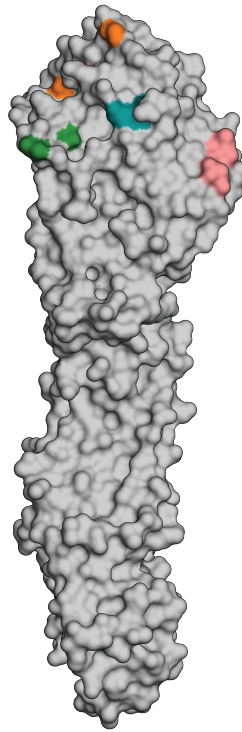

| mAb     | Epitope         | Mutations               |
|---------|-----------------|-------------------------|
| 163-13  | 1 (Ab6649, Sa)  | I176F D178N S193P L201I |
| 163-20  | 1 (Ab6649, Sa)  | K129N A149D S153G S193P |
| CA09-22 | 1 (Ab6649, Sa)  | K129N G165E S193P       |
| CA09-19 | 2               | G165E S193P             |
| CA09-45 | 2               | G165E S193P             |
| CA09-30 | 2               | K129N G165E S193P       |
| CA09-26 | 3 (5J8, Sb/Ca2) | G165E S193P             |
| CA09-16 | 3 (5J8, Sb/Ca2) | G165E S193P             |
| 163-06  | 3 (5J8, Sb/Ca2) | G165E S193P             |
| CA09-38 | 4               | G165E S193P             |
| P1-05   | 6               | G165E S193P             |
| No mAb  | N/A             | G165E S193P             |

797

798 **Figure 7. Escape mutants generated from serial passage with H1-reactive mAbs identify**

799 **their epitopes.** The mutations generated through serial passage of the A/California/07/2009 virus

800 in the presence of the indicated mAbs are mapped onto the structure of the H1 HA (PDB ID 5GJS).

801 The mutations are reported in the bottom table for each mAb and are colored as on the HA. The

802 numbering scheme for the PDB 5GJS structure is used.

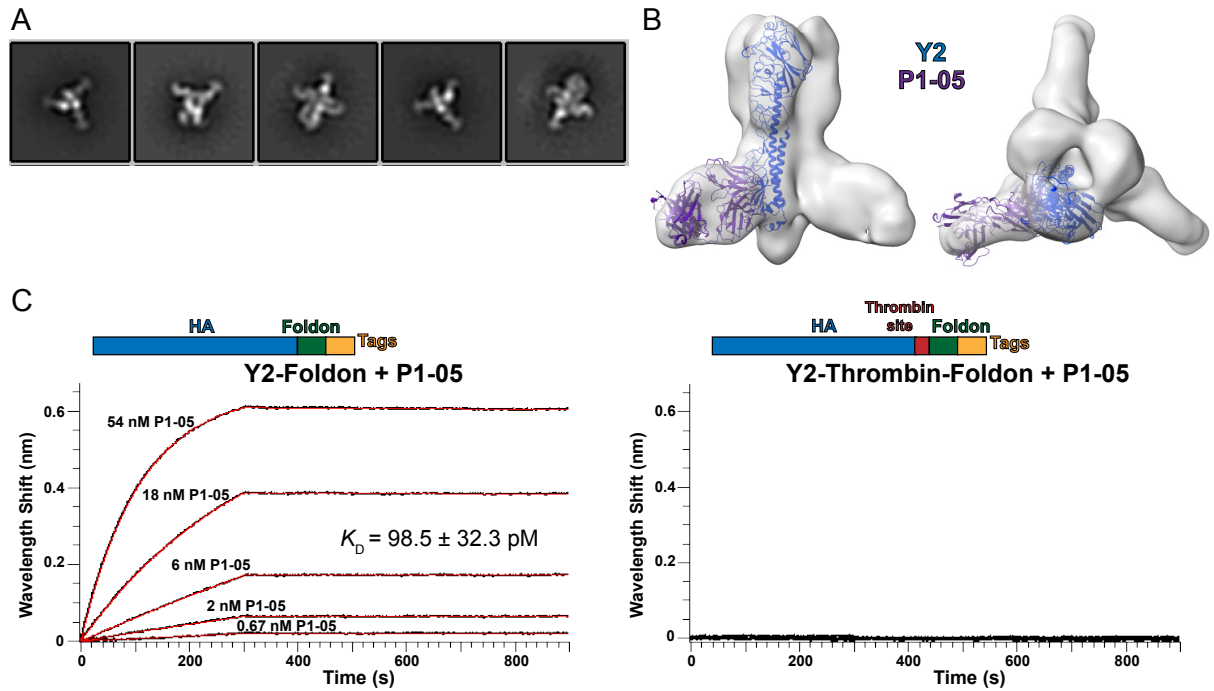

803

804 **Figure 8. Structural characterization of P1-05 binding to Y2 COBRA.** (A) 2D class averages  
805 and (B) 3D reconstruction of the Y2+P1-05 complex. (C) Comparison of P1-05 binding with Y2 in  
806 the presence or absence of a thrombin cleavage site by biolayer interferometry. Representative  
807 runs are shown. The  $K_D$  represents the mean  $\pm$  standard deviation of three independent  
808 experiments.

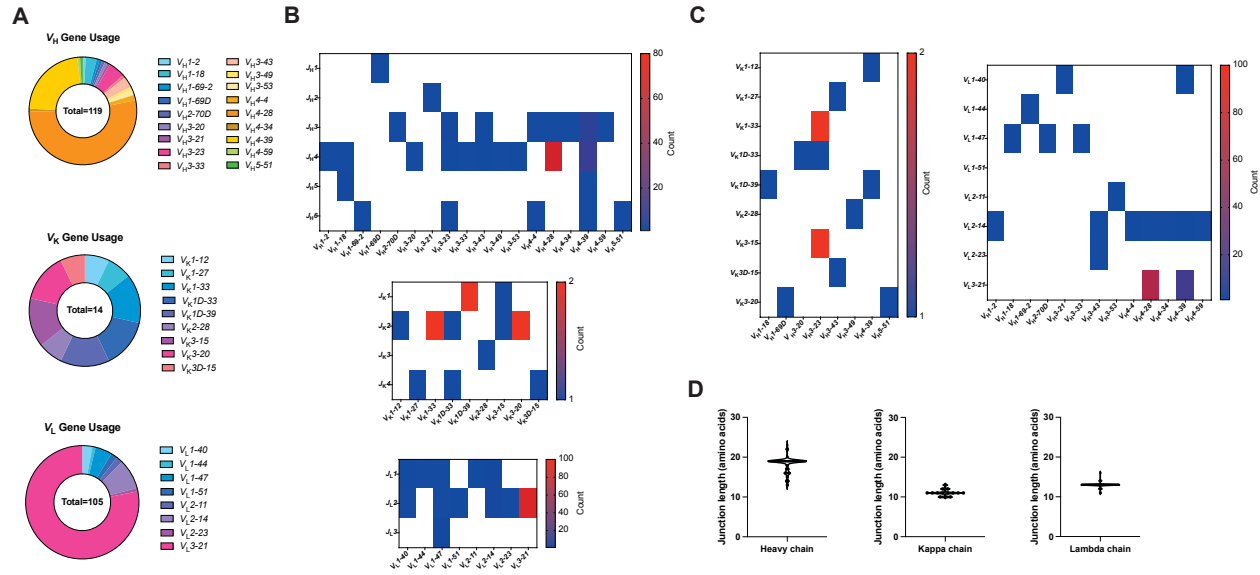

809

810 **Figure 9. Sequence characteristics of Y2 COBRA-specific B cells from a human subject**  
 811 **receiving the 2019-2020 seasonal vaccine.** (A) The usage of heavy, kappa, and lambda chain  
 812 genes are shown as a proportion of all respective genes for all B cells with paired heavy and light  
 813 chains. (B) The pairing of V and J genes are shown, with the number of B cells contributing to  
 814 each pairing for each chain, as heat maps. (C) The pairing of heavy and light chain V genes is  
 815 shown for heavy-kappa chain pairings (left) and heavy-lambda chain pairings (right) as heat maps.  
 816 (D) The amino acid lengths of the junctions for the heavy and light chains are shown.



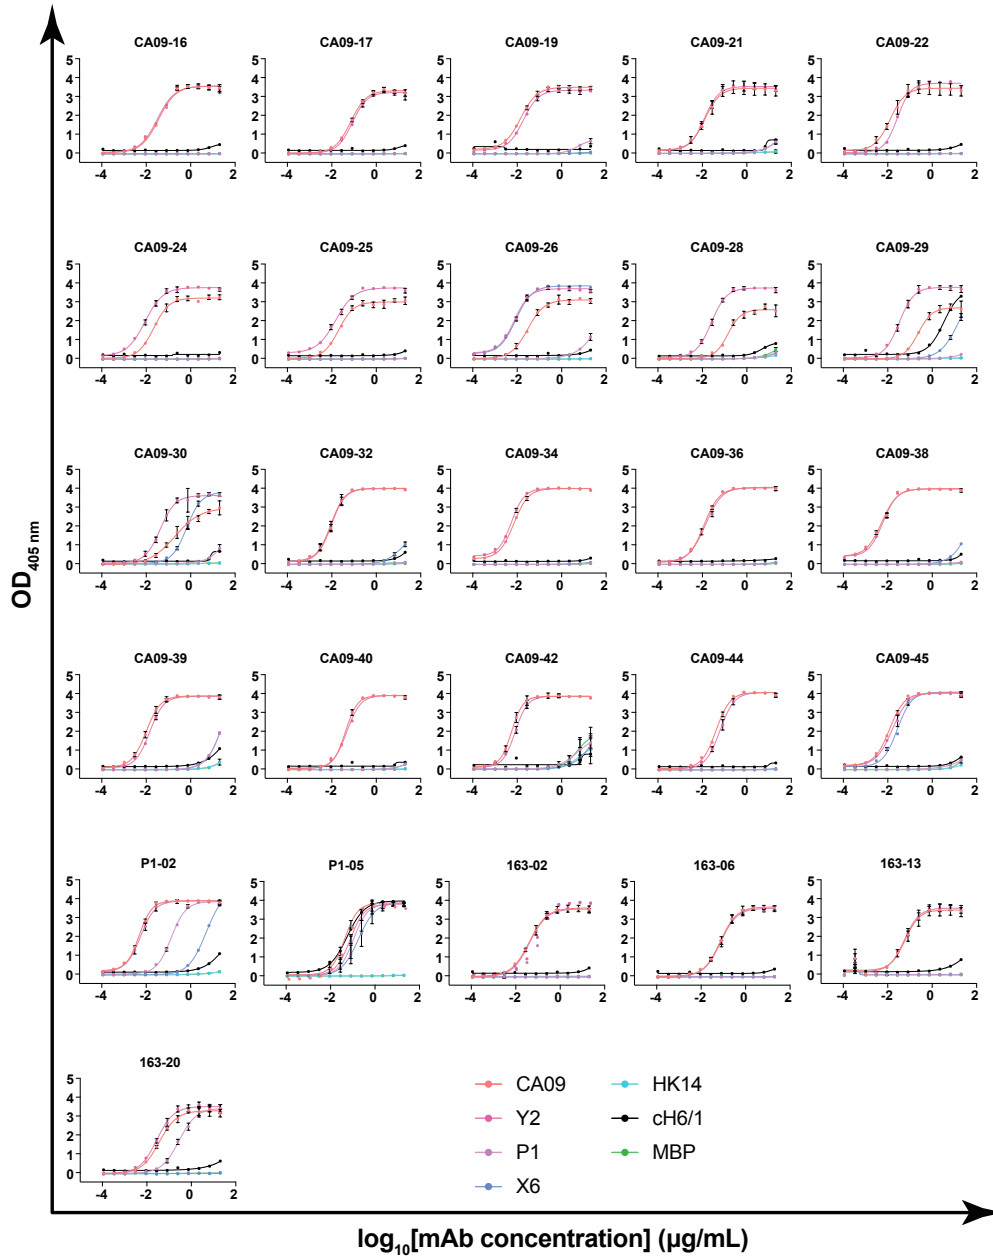

817

818 **Figure S1. Binding curves for isolated mAbs.** The optical density at 405 nm ( $OD_{405\text{ nm}}$ ) was  
819 measured by ELISA for serial three fold-dilutions of the indicated mAbs from 20  $\mu\text{g/mL}$ . This was  
820 assessed for the indicated antigens, A/California/04/2009 HA (CA09), Y2 COBRA HA (Y2), P1  
821 COBRA HA (P1), X6 COBRA HA (X6), A/Hong Kong/4801/2014 HA (HK14), chimeric H6/1 HA  
822 (cH6/1), and maltose-binding protein (MBP), a negative control.

823

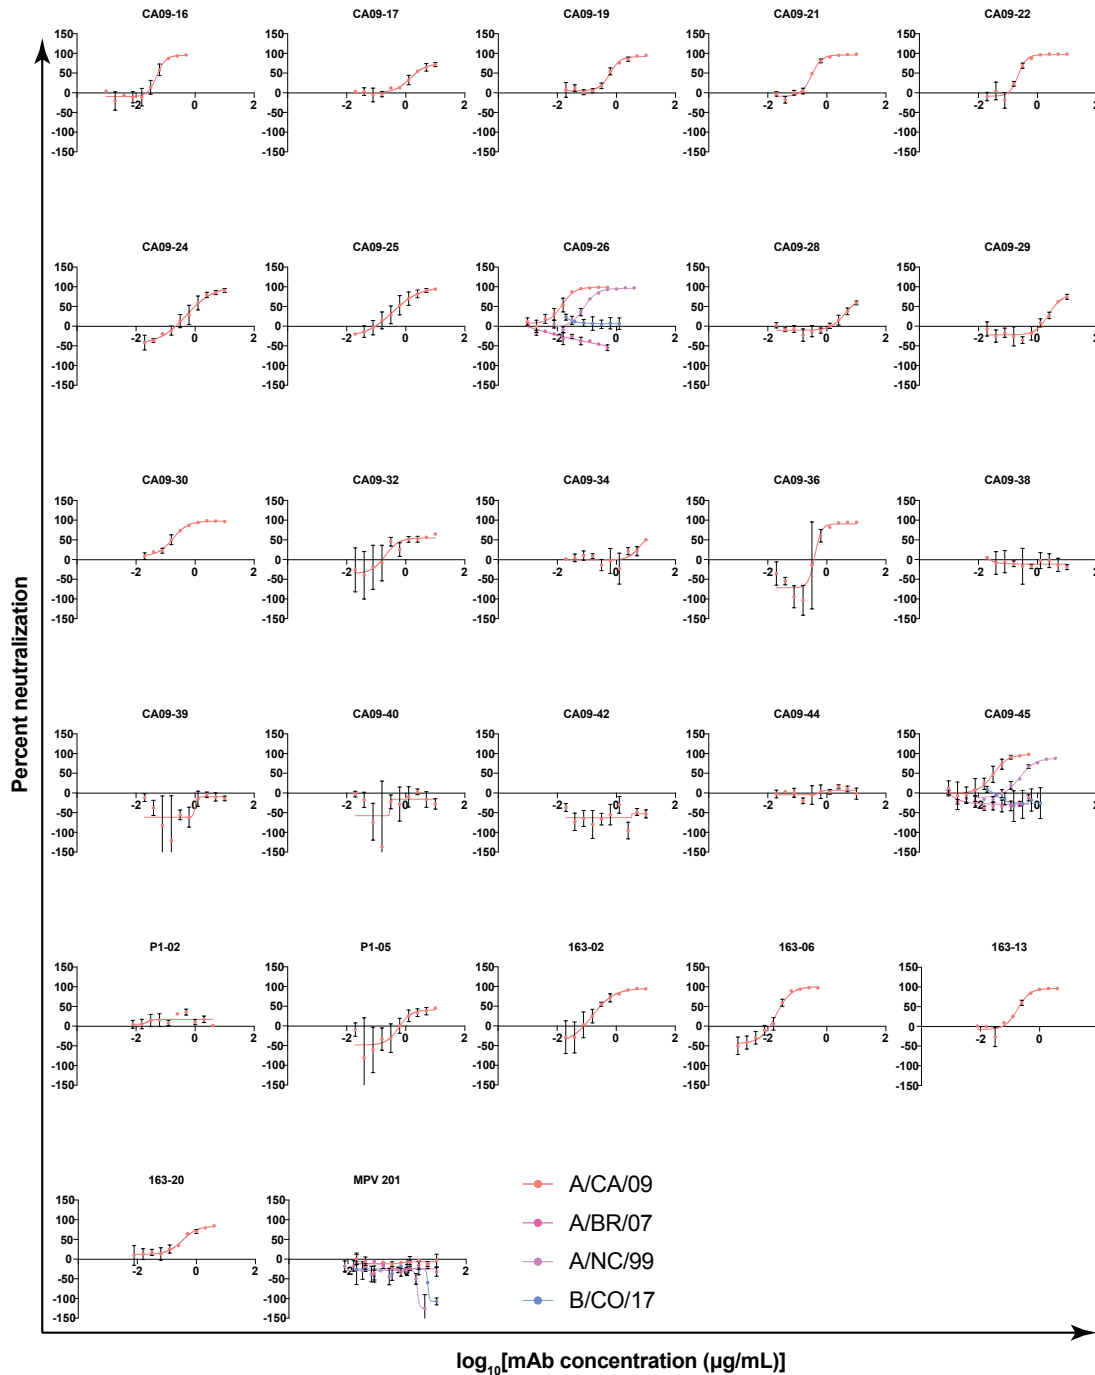

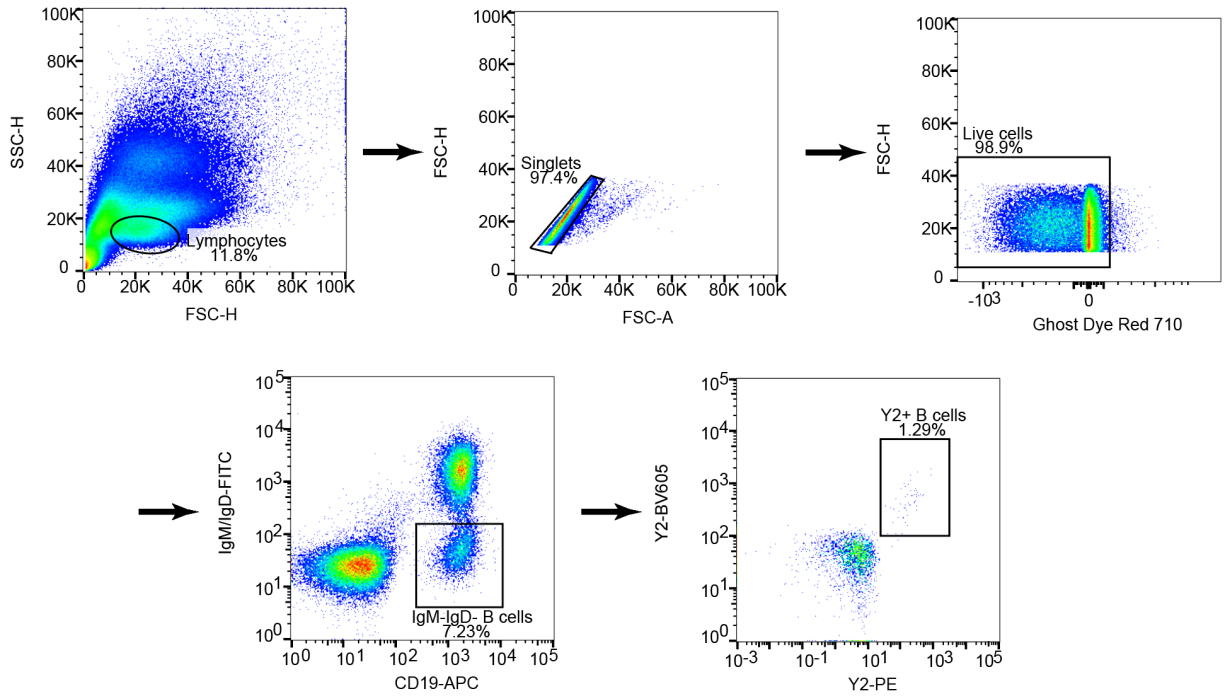

829

830 **Figure S3. Gating strategy for Y2-specific B cells from PBMCs derived from a subject**

831 **receiving the 2019-2020 seasonal vaccine.** The gating strategy for isolation of Y2-specific B

832 cells from PBMCs is shown. Live, single cells were gated, followed by gating for CD19<sup>+</sup>IgM/IgD<sup>-</sup>

833 Y2-PE<sup>+</sup>Y2-BV605<sup>+</sup> B cells.
